# Supplementary material
Source: publisher figshare collection journal article supplement (https://karger.figshare.com/ndownloader/files/27958827)

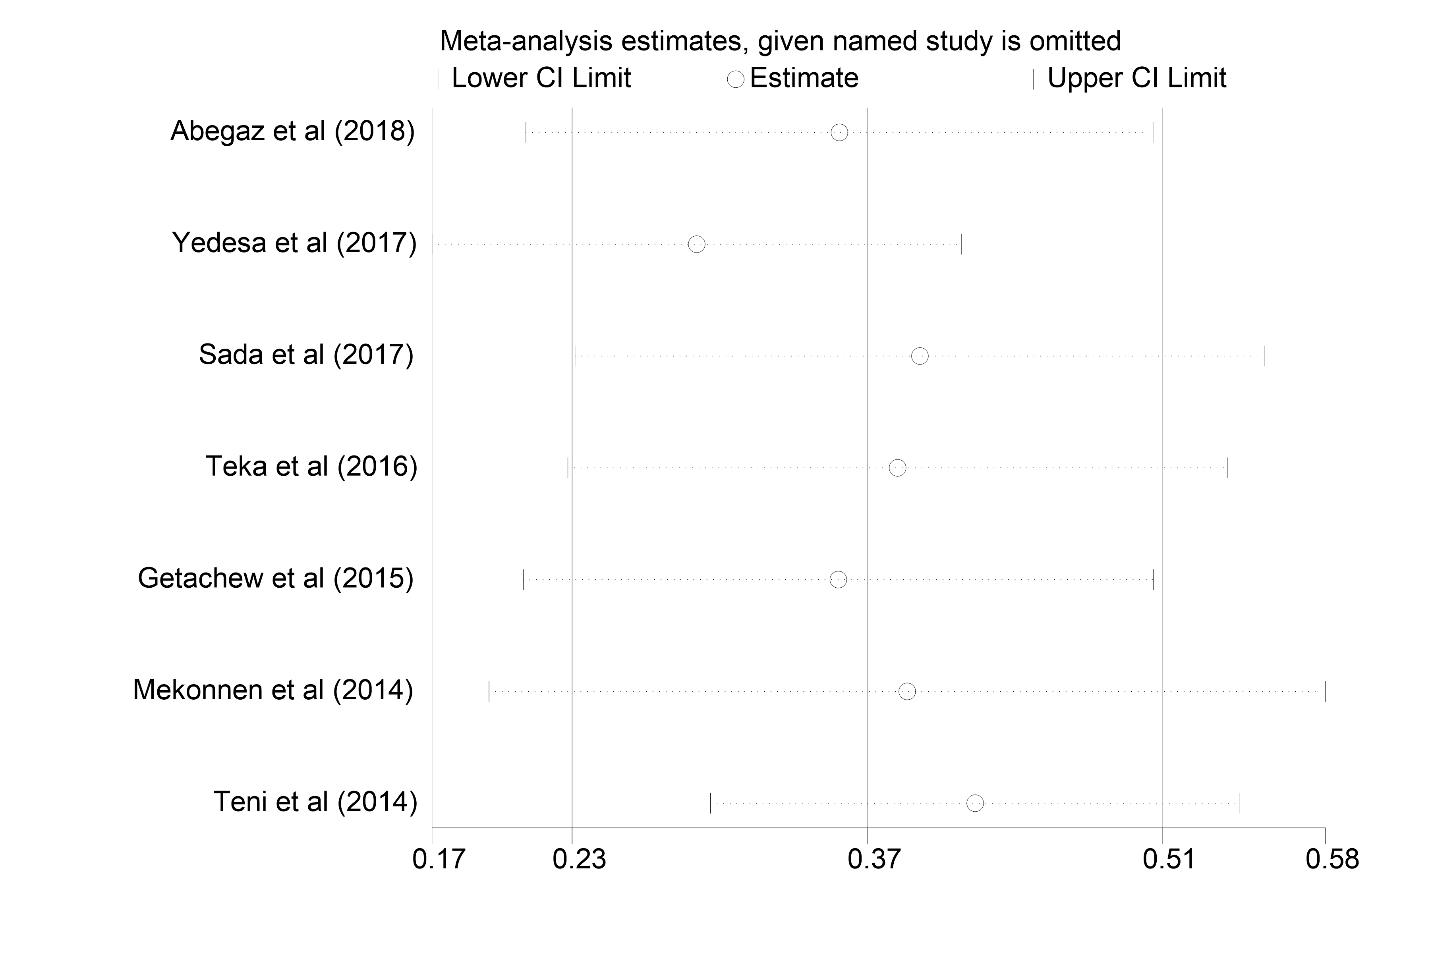


**Supplementary Figure 3**: Sensitivity analysis: Prevalence of PIMs [32,33,34,35,36,38]

Supplement: Supplementary file 1 [file 27958827]
